# Supplementary material for: EDR1 Physically Interacts with MKK4/MKK5 and Negatively Regulates a MAP Kinase Cascade to Modulate Plant Innate Immunity
Source: PubMed Central journal article supplement (PMC4022593; doi:10.1371/journal.pgen.1004389), 2014-05-15

Figure S11

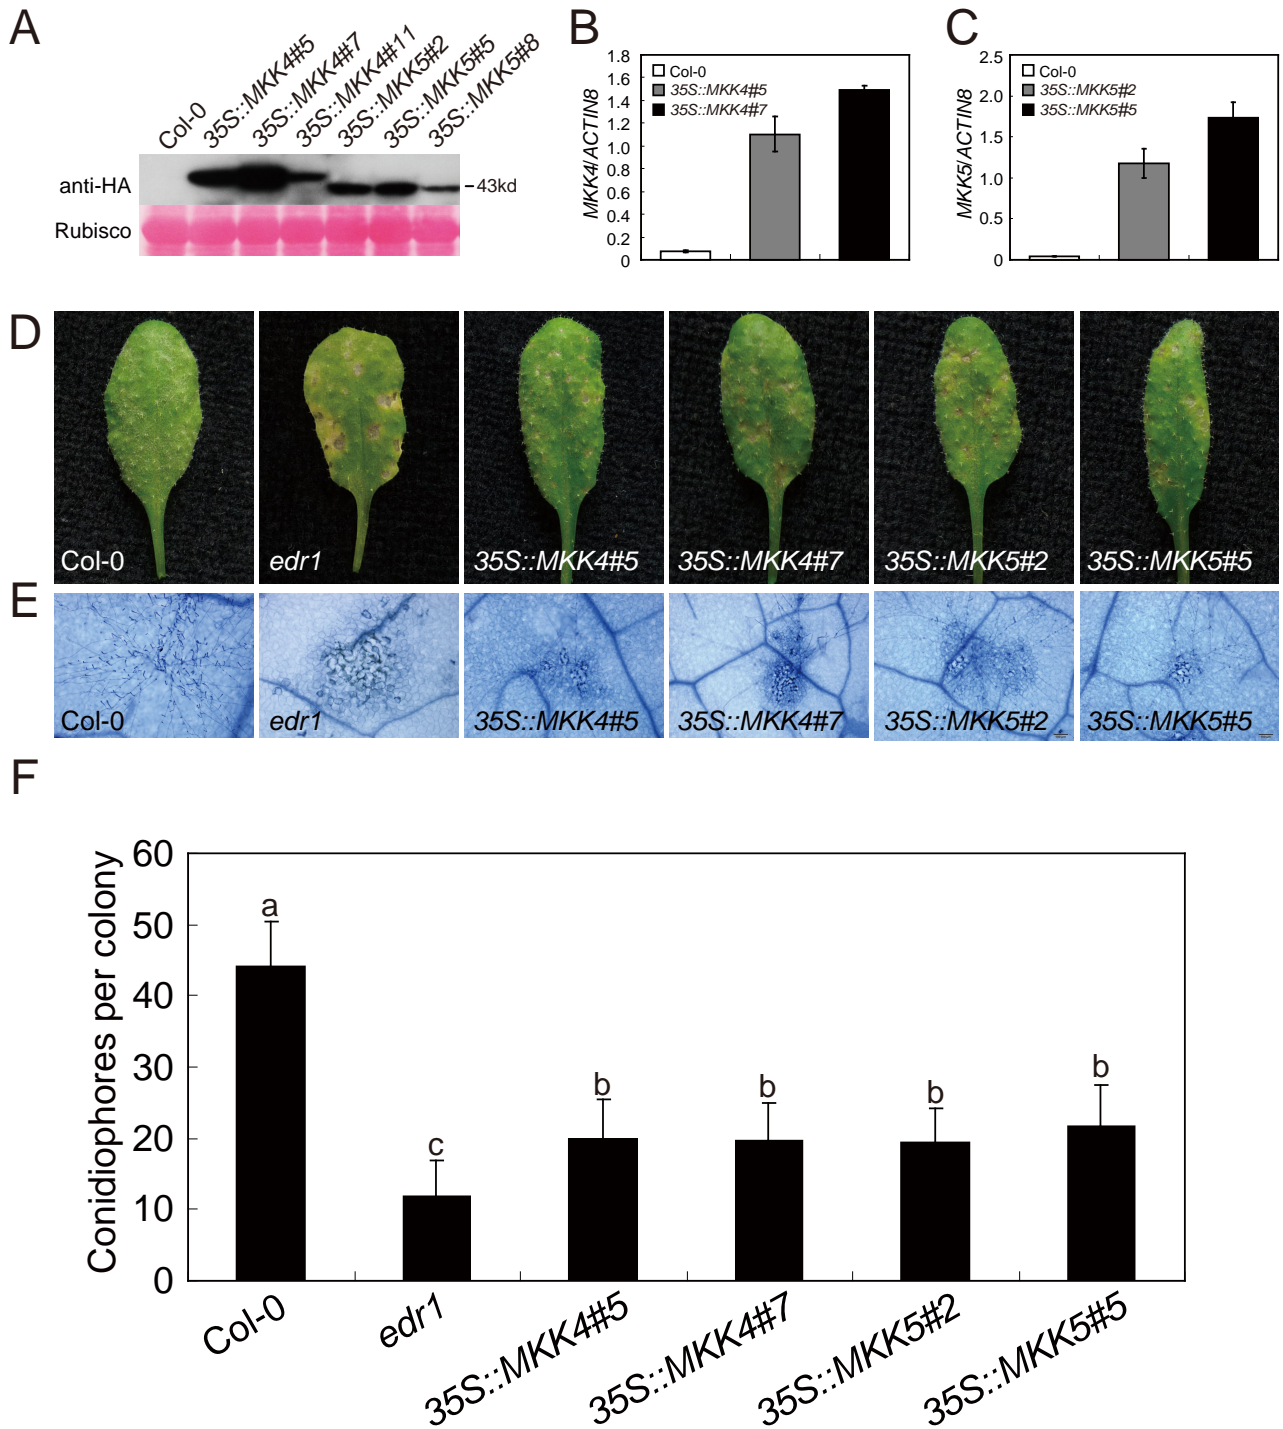

Supplement: pgen.1004389.s011.pdf [file pgen.1004389.s011.pdf]
